# Supplementary material for: The synergistic effect of cooperating solvent vapor annealing for high-efficiency planar inverted perovskite solar cells
Source: Royal Society of Chemistry journal article supplement (doi:10.1039/c9ta08791e), 2019-01-01
Supplement: c9ta08791e1.pdf [file c9ta08791e1.pdf]

## Supporting Information

Synergistic effect of cooperating solvent vapor  
annealing for high-efficiency planar inverted  
perovskite solar cells

*Ahra Yi<sup>†</sup>, Sangmin Chae<sup>†</sup>, Hanbin Lee, Hyo Jung Kim<sup>\*</sup>*

## Supporting Information

### Title

**Synergistic effect of cooperating solvent vapor annealing for high-efficiency planar inverted perovskite solar cells**

*Ahra Yi †, Sangmin Chae†, Hanbin Lee, Hyo Jung Kim\**

Department of Organic Material Science and Engineering, Pusan National University, Busan,  
South Korea

*† These authors are equally contributed to this work.*

E-mail to: [hyojkim@pusan.ac.kr](mailto:hyojkim@pusan.ac.kr)

## ***Contents***

**Figure S1** a) The atomic force microscopy (AFM) and b) device images using various amount of DMSO solvent.

**Figure S2** a) The scanning electron microscopy (SEM) and b) device images of an optimization process using various ratio of DMSO:DI water 1  $\mu$ L.

**Figure S3** XPS spectra and analyses of the SVA-processed perovskite films a) Pb 4f b) I 3d.

**Figure S4** The statistical graphs displaying the device efficiency of more than 50 cells as a function of the DMSO:DI water ratio during the SVA process.

**Figure S5** The instantaneous J-V curves of the perovskite solar cells with definite hysteresis.

**Figure S6** Photoluminescence (PL) spectra and time-resolved PL (TRPL) spectra of the pristine and SVA-processed perovskite films.

**Figure S7** The dark I–V curves of the pristine and SVA-processed device revealing the  $V_{TFL}$  kink point behavior.

**Figure S8** X-ray diffraction spectra of the pristine and SVA-processed MAPbI<sub>3</sub> films.

**Table S1** The detailed information of C 1s spectra.

**Table S2** The detailed information of N 1s spectra.

**Table S3** The detailed information of O 1s spectra.

All measured spectra were corrected to 284.8 eV according to the C 1s binding energy for aliphatic carbon and the fitting was performed using the Gaussian-Lorentzian function.

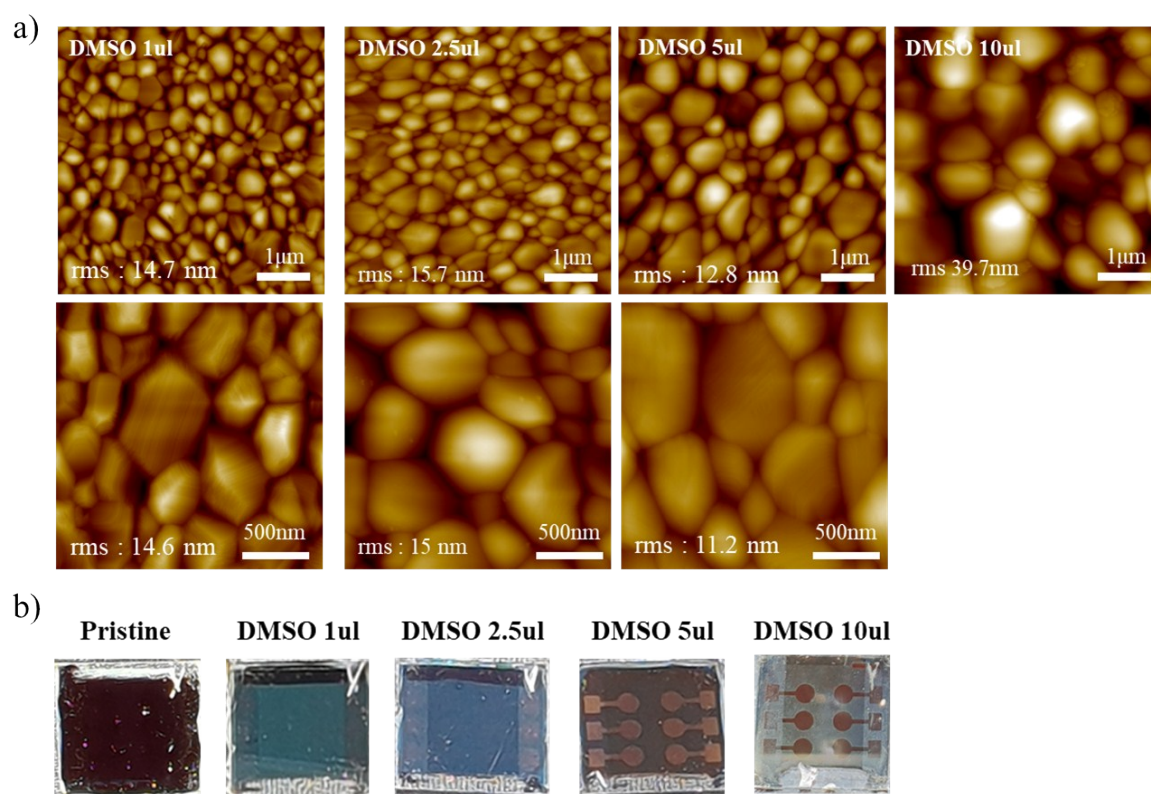

**Figure S1** a) The atomic force microscopy (AFM) and b) device images using various amount of DMSO solvent.

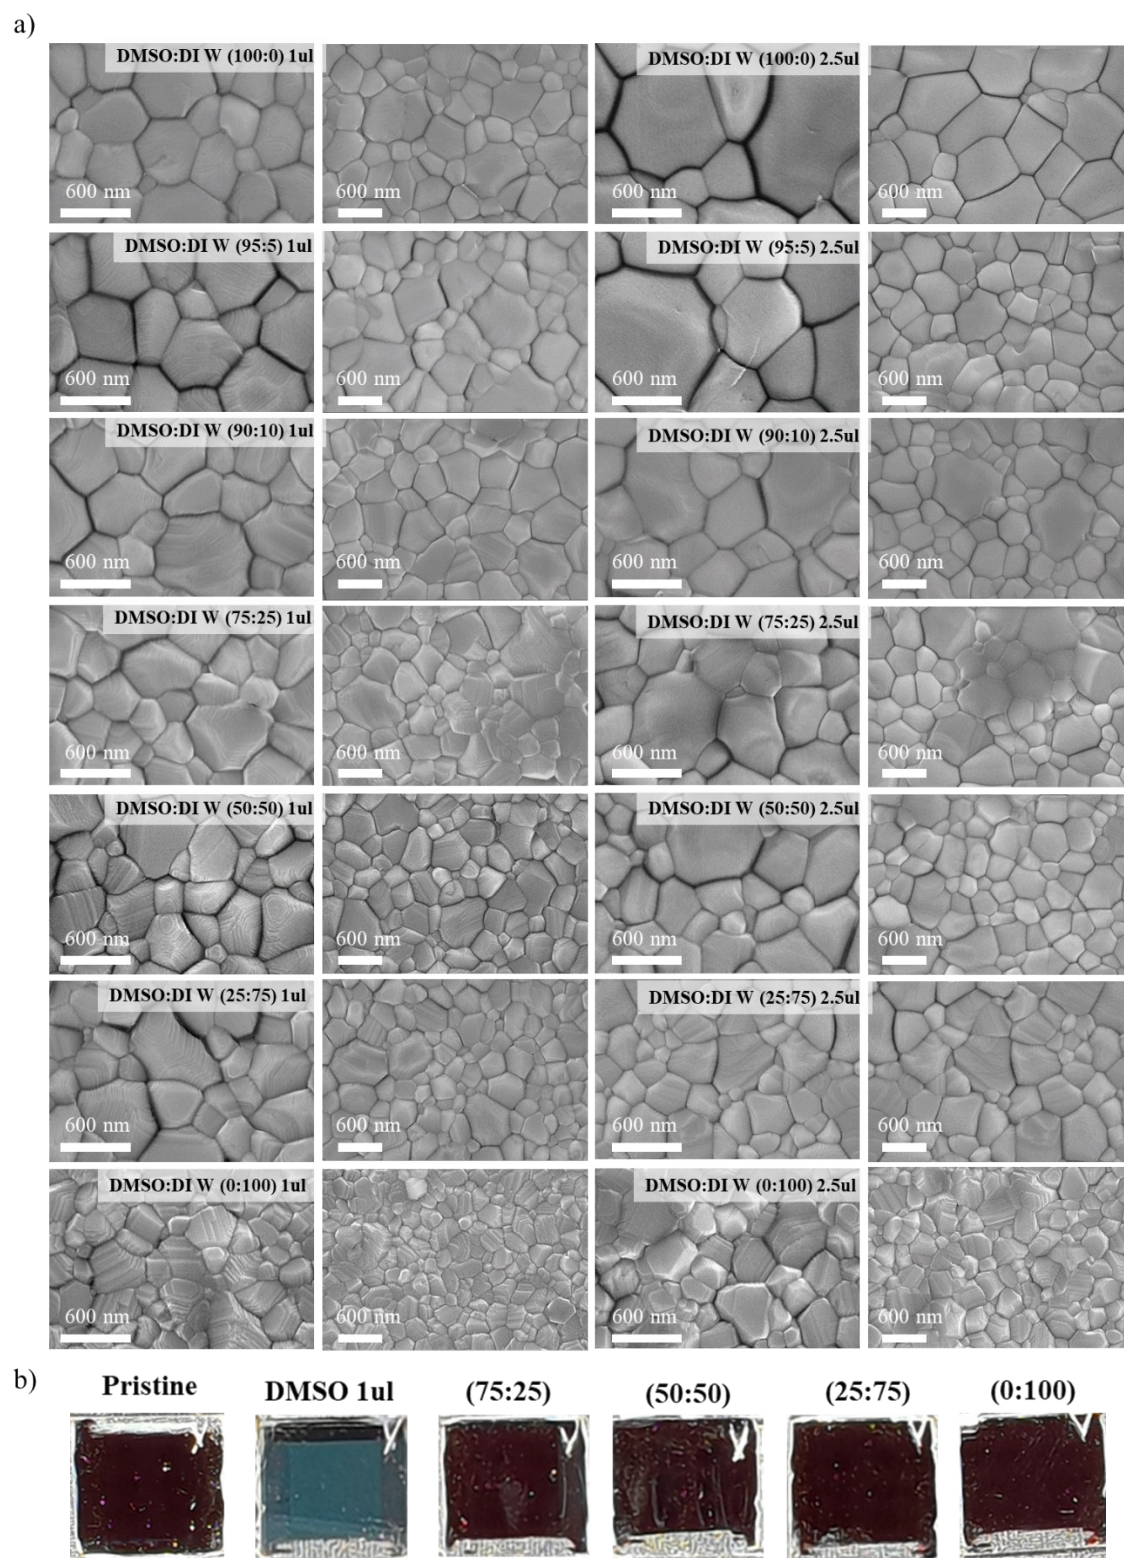

**Figure S2** a) The scanning electron microscopy (SEM) and b) device images of an optimization process using various ratio of DMSO:DI water 1 uL.

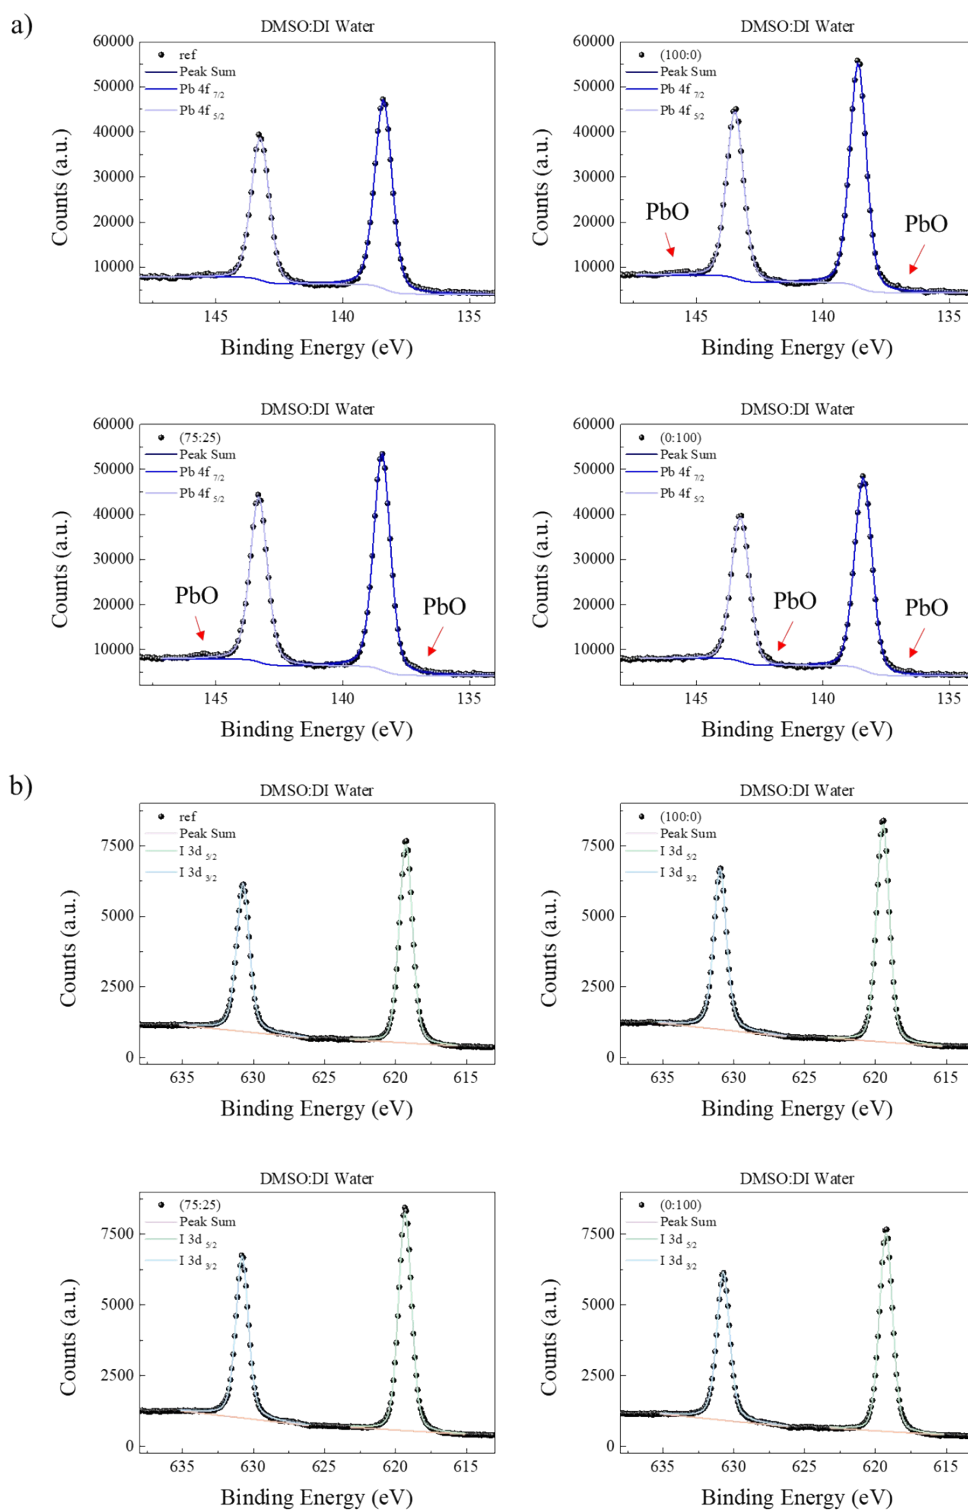

**Figure S3** a) XPS spectra and analyses of the SVA-processed perovskite films a) Pb 4f b) I 3d.

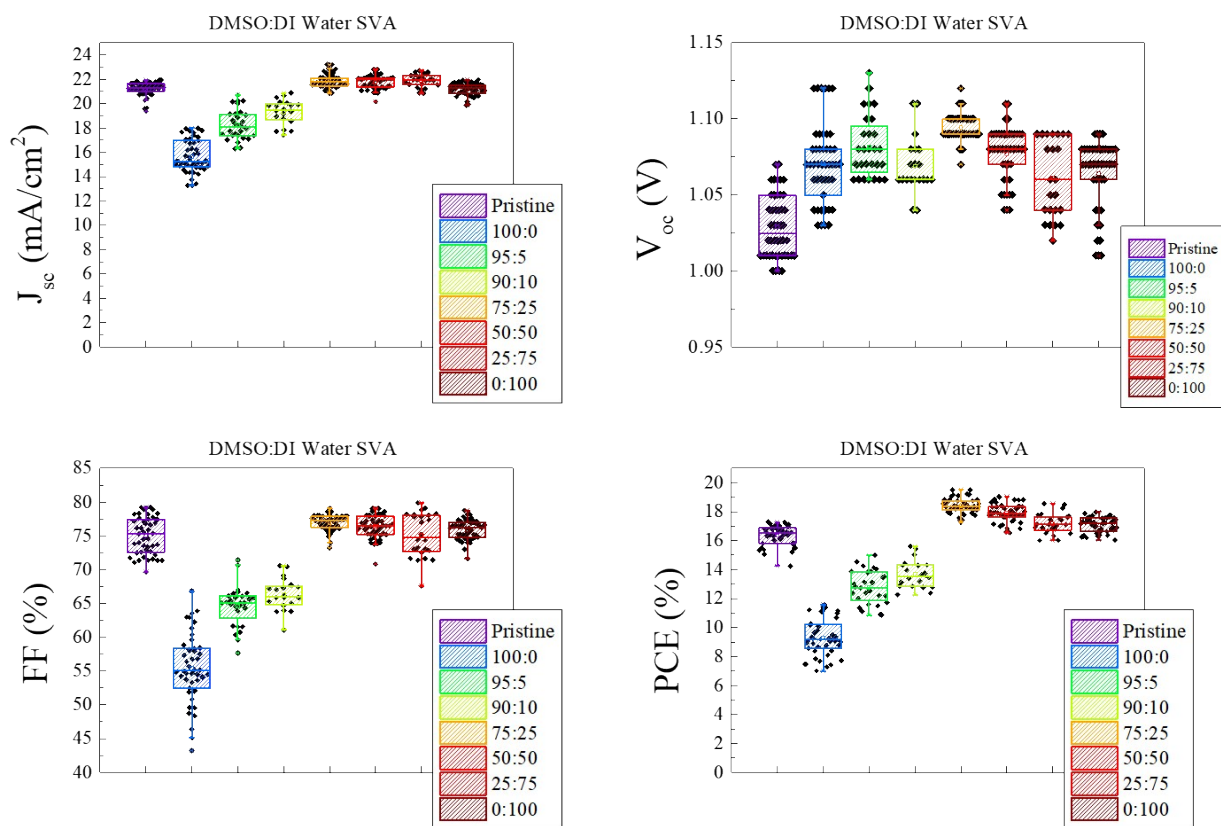

**Figure S4** The statistical graphs displaying the device efficiency of more than 50 cells as a function of the DMSO:DI water ratio during the SVA process.

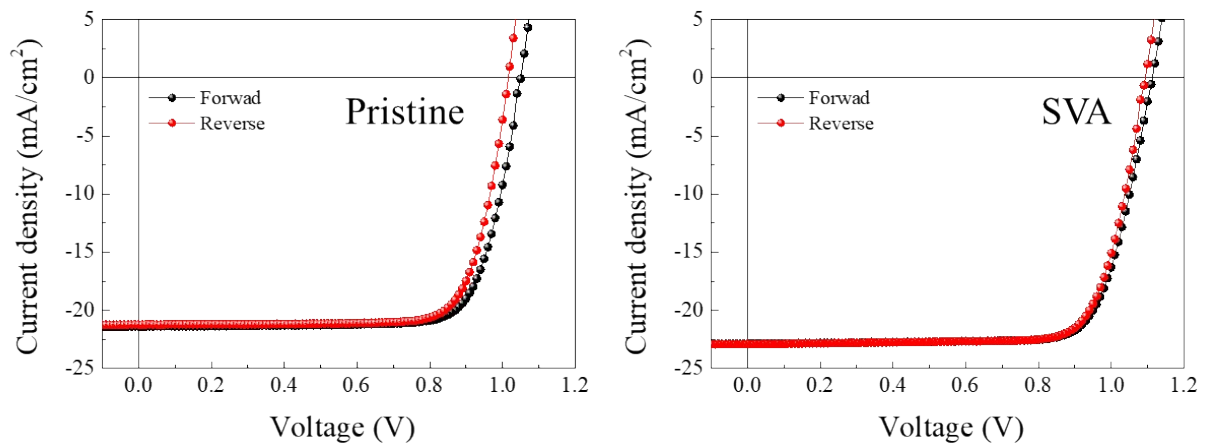

**Figure S5** The instantaneous J-V curves of the perovskite solar cells with definite hysteresis. The black line indicates a forward scan and the red line is the reverse scan. The J-V curve of the SVA-processed device shows negligible hysteresis and similar photovoltaic parameters regardless of the scan direction.



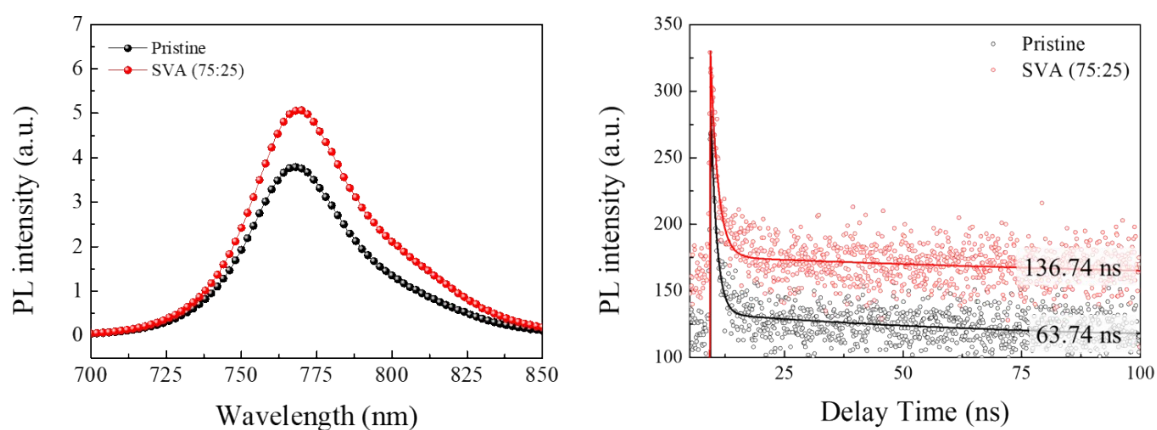

**Figure S6** Photoluminescence (PL) spectra and time-resolved PL (TRPL) spectra of the pristine and SVA-processed perovskite films.

|          | $\tau_{\text{avg}}$ | $A_1$   | Proportion (%) | $\tau_1$ (ns) | $A_2$  | Proportion (%) | $\tau_2$ (ns) |
|----------|---------------------|---------|----------------|---------------|--------|----------------|---------------|
| Pristine | 63.738              | 164.996 | 88.69          | 1.242         | 21.031 | 11.31          | 72.175        |
| SVA      | 136.737             | 164.354 | 87.87          | 1.556         | 22.689 | 12.13          | 147.10        |

For, TRPL analysis, the curves were fitted using a bi-exponential decay model ( $y = A_1 \exp[-(x-x_0)/\tau_1] + A_2(\exp[-(x-x_0)/\tau_2])$ ), and the fitted parameters are summarized in Table.

First, the steady-state photoluminescence (PL) results showed that the intensity of SVA-treated thin films is higher than that of pristine. This result indicated that SVA treatment was effective for reducing grain density and grain boundaries passivation in perovskite films which was also consistent with time-resolved PL (TRPL). The SVA films showed both prolonged  $\tau_1$  (due to charge carrier trapping defect) and  $\tau_2$  (due to bimolecular radiative recombination in the bulk crystals). In particular,  $\tau_2$  increased by more than about two times, indicating that the bulk carrier life is longer due to the much larger grain size, improved perovskite crystallinity and preferred orientation with SVA treatment.

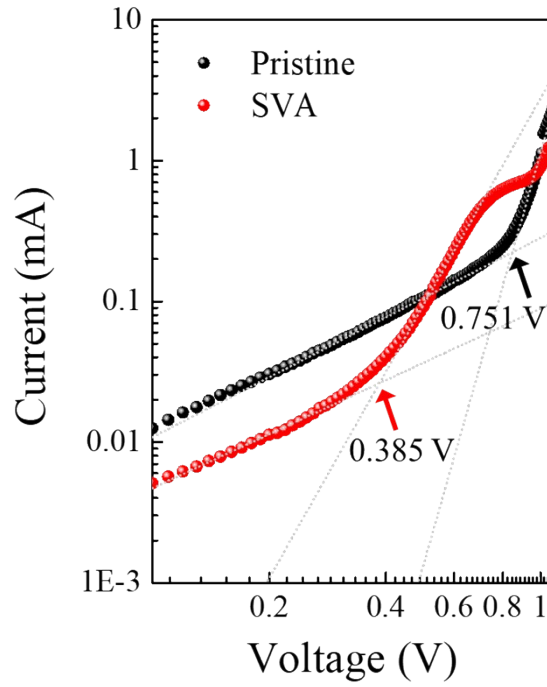

**Figure S7** The dark I–V curves of the pristine and SVA-processed device revealing the  $V_{TFL}$  kink point behavior.

We also conducted the space charge limited current (SCLC) examinations with a structure of ITO / NiOx / Perovskite / Au to assess the trap density in the films. As shown in Figure below, the devices exhibit ohmic response (linear relation) at low bias and a marked increase of the current injection at the intermediate region since the traps are continuously filled with increasing bias until reaching the trap-filling limit voltage ( $V_{TFL}$ ). And the defects density is calculated from the  $V_{TFL}$  based on Equation (1)<sup>1-2</sup>

$$n_t = \frac{2\varepsilon\varepsilon_0 V_{TFL}}{eL^2} \quad (1)$$

where  $\varepsilon$  is the relative dielectric constant of perovskite,  $\varepsilon_0$  is the vacuum permittivity,  $e$  is the electron charge, and  $L$  is the thickness of perovskite film.

The calculated values indicate that the Pristine thin film was  $7.90 \times 10^{15} \text{ cm}^{-3}$  and the SVA thin film was  $4.05 \times 10^{15} \text{ cm}^{-3}$ , which revealed the reduced trap density by about two times than that of the pristine.



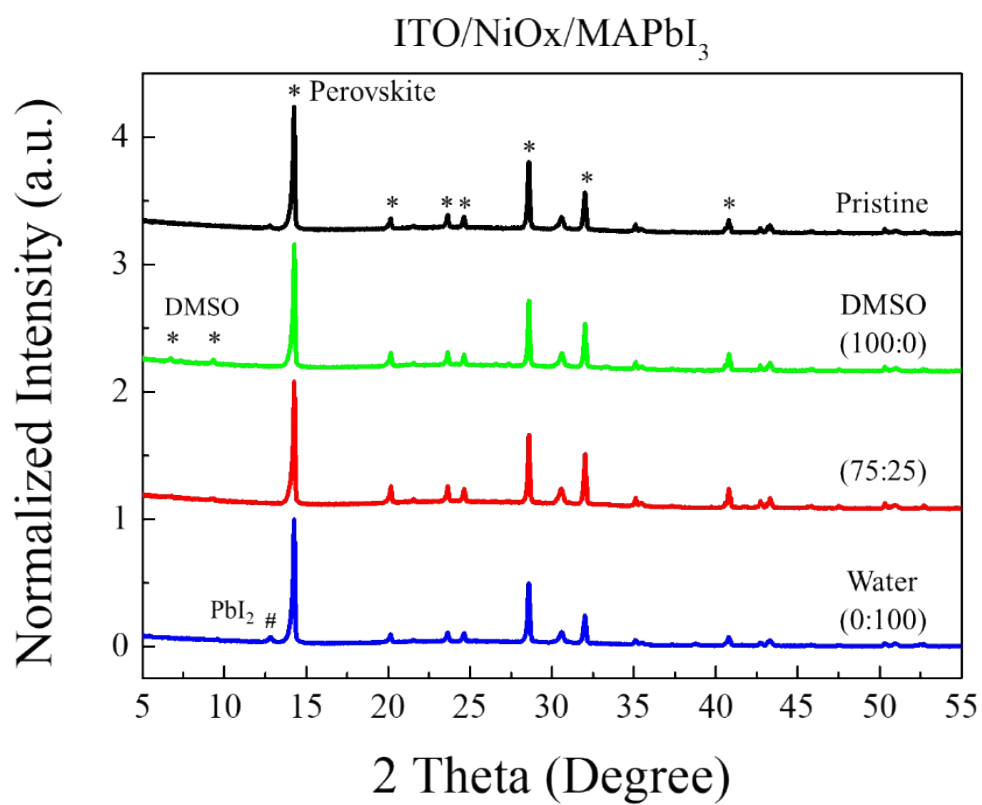

**Figure S8** X-ray diffraction spectra of the pristine and SVA-processed MAPbI<sub>3</sub> films.

**Table S 1** The detailed information of C 1s spectra.

| MAPbI <sub>3</sub> | C 1s             | O=C-OH  | O-C-O/O-C=O | C-O-C/C=O | CH <sub>3</sub> -NH <sub>3</sub> <sup>+</sup> | CH <sub>3</sub> -NH <sub>2</sub> | C-OH    | C-C/C-H | intermediate |
|--------------------|------------------|---------|-------------|-----------|-----------------------------------------------|----------------------------------|---------|---------|--------------|
| ref                | B.E (eV)         |         |             |           | 286.88                                        | 286.48                           | 285.27  | 284.80  | 284.37       |
|                    | Intensity (a.u.) |         |             |           | 4093.53                                       | 6250.34                          | 1188.08 | 1748.67 | 408.11       |
|                    | FWHM (eV)        |         |             |           | 1.358                                         | 0.876                            | 0.766   | 0.913   | 0.656        |
|                    | Percentage (%)   |         |             |           | 29.90%                                        | 45.66%                           | 8.68%   | 12.77%  | 2.98%        |
| (100:0)            | B.E (eV)         | 289.63  |             | 287.33    | 286.68                                        | 286.32                           | 285.24  | 284.80  | 284.36       |
|                    | Intensity (a.u.) | 1176.27 |             | 719.42    | 3338.61                                       | 4872.89                          | 2045.45 | 1438.85 | 1194.95      |
|                    | FWHM (eV)        | 2.926   |             | 1.125     | 0.964                                         | 0.815                            | 0.803   | 0.474   | 0.666        |
|                    | Percentage (%)   | 7.96%   |             | 4.87%     | 22.58%                                        | 32.96%                           | 13.83%  | 9.73%   | 8.08%        |
| (75:25)            | B.E (eV)         |         | 288.24      | 287.49    | 286.70                                        | 286.23                           | 285.50  | 284.80  | 284.24       |
|                    | Intensity (a.u.) |         | 830.27      | 539.57    | 3305.50                                       | 3833.41                          | 1521.50 | 2451.18 | 1151.08      |
|                    | FWHM (eV)        |         | 1.516       | 0.557     | 0.904                                         | 0.684                            | 0.836   | 0.838   | 0.732        |
|                    | Percentage (%)   |         | 6.09%       | 3.96%     | 24.25%                                        | 28.12%                           | 11.16%  | 17.98%  | 8.44%        |
| (0:100)            | B.E (eV)         | 289.16  |             |           | 286.79                                        | 286.29                           | 285.30  | 284.80  | 284.28       |
|                    | Intensity (a.u.) | 359.71  |             |           | 3940.80                                       | 5235.25                          | 907.39  | 1504.32 | 1223.04      |
|                    | FWHM (eV)        | 0.539   |             |           | 1.544                                         | 0.898                            | 0.539   | 0.642   | 0.772        |
|                    | Percentage (%)   | 2.73%   |             |           | 29.92%                                        | 39.75%                           | 6.89%   | 11.42%  | 9.29%        |

**Table S 2** The detailed information of N 1s spectra.

| MAPbI <sub>3</sub> | N 1s             | N-C=O  | CH <sub>3</sub> -NH <sub>3</sub> <sup>+</sup> | CH <sub>3</sub> -NH <sub>2</sub> | R-NH <sub>2</sub> |
|--------------------|------------------|--------|-----------------------------------------------|----------------------------------|-------------------|
| ref                | B.E (eV)         | 403.62 | 402.71                                        | 402.20                           | 401.72            |
|                    | Intensity (a.u.) | 73.44  | 2971.86                                       | 3362.40                          | 703.69            |
|                    | FWHM (eV)        | 0.404  | 0.916                                         | 0.823                            | 0.975             |
|                    | Percentage (%)   | 0.93%  | 41.79%                                        | 47.38%                           | 9.90%             |
| (100:0)            | B.E (eV)         | 403.33 | 402.69                                        | 402.23                           | 401.65            |
|                    | Intensity (a.u.) | 335.16 | 3068.18                                       | 2544.84                          | 159.42            |
|                    | FWHM (eV)        | 0.724  | 0.865                                         | 0.83                             | 0.494             |
|                    | Percentage (%)   | 5.49%  | 50.24%                                        | 41.67%                           | 2.61%             |
| (75:25)            | B.E (eV)         | 403.10 | 402.51                                        | 402.11                           | 401.42            |
|                    | Intensity (a.u.) | 377.36 | 3459.12                                       | 2225.70                          | 157.23            |
|                    | FWHM (eV)        | 0.765  | 0.961                                         | 0.855                            | 0.498             |
|                    | Percentage (%)   | 6.07%  | 55.62%                                        | 35.79%                           | 2.53%             |
| (0:100)            | B.E (eV)         | 403.20 | 402.59                                        | 402.11                           | 401.28            |
|                    | Intensity (a.u.) | 599.26 | 3723.88                                       | 2571.40                          | 94.04             |
|                    | FWHM (eV)        | 0.979  | 0.912                                         | 0.835                            | 0.402             |
|                    | Percentage (%)   | 8.57%  | 53.29%                                        | 36.79%                           | 1.35%             |

**Table S 3** The detailed information of O 1s spectra.

| MAPbI <sub>3</sub> | O 1s             | H <sub>2</sub> O | O=C-N  | O=C-OH | O=C-O  | O-C-O  | C=O    | C-O    | intermediate |
|--------------------|------------------|------------------|--------|--------|--------|--------|--------|--------|--------------|
| ref                | B.E (eV)         |                  | 534.76 |        | 533.77 |        | 532.67 |        | 531.80       |
|                    | Intensity (a.u.) |                  | 55.50  |        | 293.43 |        | 286.06 |        | 46.43        |
|                    | FWHM (eV)        |                  | 0.650  |        | 1.055  |        | 1.279  |        | 0.592        |
|                    | Percentage (%)   |                  | 8.14%  |        | 43.06% |        | 41.98% |        | 6.81%        |
| (100:0)            | B.E (eV)         |                  | 534.92 | 534.26 | 533.57 |        | 532.67 |        | 531.83       |
|                    | Intensity (a.u.) |                  | 102.56 | 69.63  | 422.13 |        | 362.21 |        | 140.91       |
|                    | FWHM (eV)        |                  | 1.476  | 0.312  | 1.007  |        | 0.862  |        | 0.696        |
|                    | Percentage (%)   |                  | 9.35%  | 6.35%  | 38.46% |        | 33.01% |        | 12.84%       |
| (75:25)            | B.E (eV)         | 536.06           | 534.46 |        | 533.63 | 533.03 |        | 532.49 | 531.76       |
|                    | Intensity (a.u.) | 88.22            | 92.60  |        | 169.45 | 307.22 |        | 197.78 | 74.77        |
|                    | FWHM (eV)        | 1.569            | 0.680  |        | 0.668  | 0.558  |        | 0.666  | 0.401        |
|                    | Percentage (%)   | 9.49%            | 9.96%  |        | 18.22% | 33.03% |        | 21.27% | 8.04%        |
| (0:100)            | B.E (eV)         | 535.95           | 534.45 | 533.92 |        | 533.16 |        | 532.48 | 531.90       |
|                    | Intensity (a.u.) | 128.21           | 102.56 | 141.03 |        | 331.92 |        | 192.31 | 97.84        |
|                    | FWHM (eV)        | 1.063            | 0.730  | 0.748  |        | 0.920  |        | 0.485  | 0.614        |
|                    | Percentage (%)   | 12.90%           | 10.32% | 14.19% |        | 33.40% |        | 19.35% | 9.84%        |

## Reference

- (1) Adv. Energy Mater. 2019, 1901852
- (2) Energy Environ. Sci., 2018,11, 3349-3357
